# Supplementary material for: IGF1R regulates retrograde axonal transport of signalling endosomes in motor neurons
Source: PubMed Central journal article supplement (PMC7054680; doi:10.15252/embr.201949129), 2020-02-07
Supplement: EMBR-21-e49129-s001.pdf [file EMBR-21-e49129-s001.pdf]

TABLE OF CONTENTS

***Appendix Figure S1- The IGF1R pathway influences retrograde axonal transport of signalling endosomes ..... 2***

***Appendix Figure S2- Akt inhibition increases the velocity of retrograde signalling endosomes ..... 3***

***Appendix Figure S3- IGF1R modulation has no effect on microtubule post-translational modifications..... 5***

***Appendix Figure S4- IGF1R activity does not affect axonal transport of lysosomes ..... 7***

***Appendix Figure S5- IGF1R modulation has no effect on the expression of cytoplasmic dynein or Kinesin-1 ..... 9***

***Appendix Figure S6- Example images from puromycin-PLA ..... 10***

***Appendix Figure S7- IGF1R inhibition increases the rate of retrograde axonal transport in an ALS mouse model..... 11***

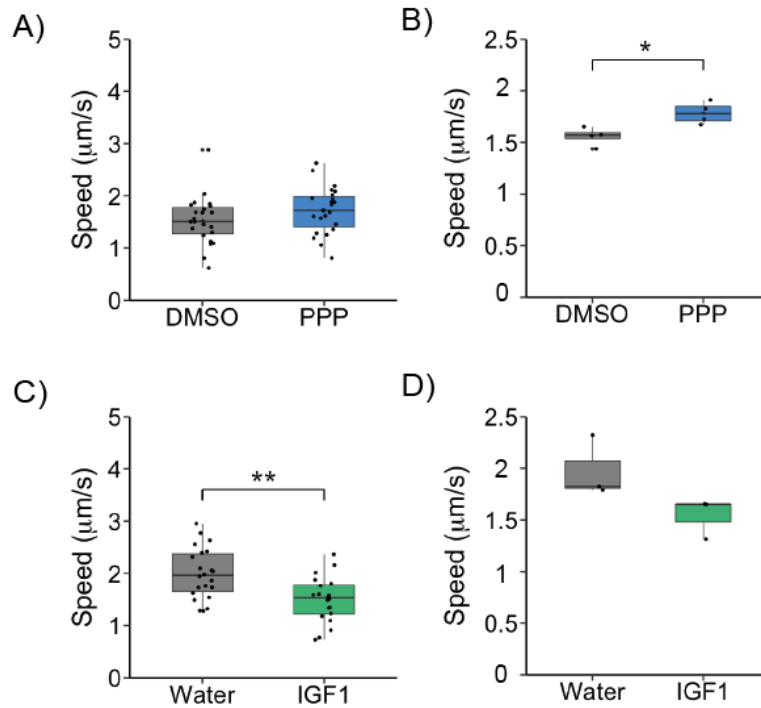

APPENDIX FIGURE S1- THE IGF1R PATHWAY INFLUENCES RETROGRADE AXONAL TRANSPORT OF SIGNALLING ENDOSOMES

A) Graph shows the average velocity of H<sub>c</sub>T-containing organelles per axon after PPP treatment (P=0.15, Student's T-test, N=4 independent experiments, boxplot shows median, first and third quartiles. Upper/lower whiskers extend to 1.5 \* the interquartile range, boxplot shows median, first and third quartiles).

B) Graph shows the average velocity of H<sub>c</sub>T-containing organelles per experiment after PPP treatment (\* P=0.017, Student's T-test, N=4 independent experiments, boxplot shows median, first and third quartiles. Upper/lower whiskers extend to 1.5 \* the interquartile range).

C) Graph shows the average velocity of H<sub>c</sub>T-containing organelles per axon after IGF1 treatment (\*\* P=0.001, Student's T-test, N=3 independent experiments, boxplot shows median, first and third quartiles. Upper/lower whiskers extend to 1.5 \* the interquartile range).

D) Graph shows the average velocity of H<sub>c</sub>T-containing organelles per experiment after IGF1 treatment (P=0.09, Student's T-test, N=3 independent experiments, boxplot shows median, first and third quartiles. Upper/lower whiskers extend to 1.5 \* the interquartile range).

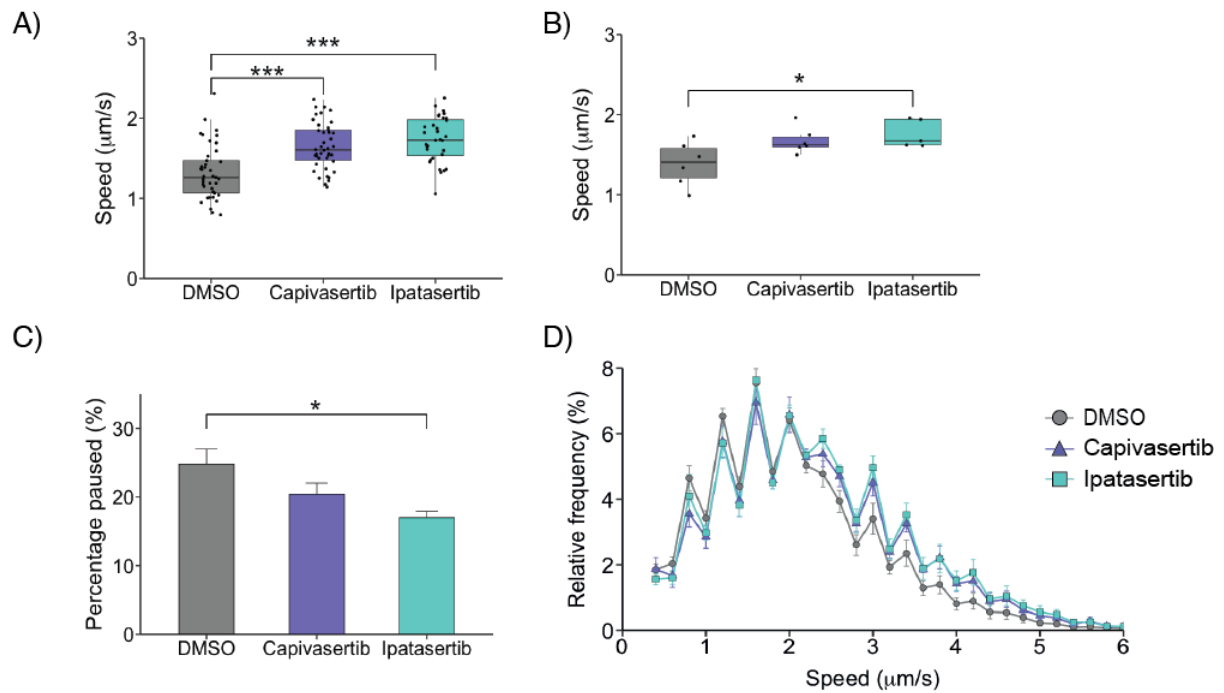

**APPENDIX FIGURE S2- AKT INHIBITION INCREASES THE VELOCITY OF RETROGRADE SIGNALLING ENDOSOMES**

A) Graph shows the average velocity of H<sub>c</sub>T-containing organelles per axon after Capivasertib and Ipatasertib treatment for 45 mins before imaging (DMSO: 483 endosomes, 34 axons, 41,897 movements; Capivasertib: 658 endosomes, 43 axons, 49,841 movements; Ipatasertib: 605 endosomes, 32 axons, 41,485 movements, \*\*\*  $P=2.44 \times 10^{-7}$ , One-way ANOVA, Tukey's post-hoc test: DMSO-Capivasertib \*\*\*  $P=8.9 \times 10^{-5}$ , DMSO-Ipatasertib \*\*\*  $P=2.5 \times 10^{-5}$ , N=6 independent experiments, boxplot shows median, first and third quartiles. Upper/lower whiskers extend to 1.5 \* the interquartile range).

B) Graph shows the average velocity of H<sub>c</sub>T-containing organelles per experiment after treatment with Capivasertib and Ipatasertib for 45 mins before imaging (\*  $P=0.025$ , One-way ANOVA, Tukey's post-hoc test: DMSO-Capivasertib  $P=0.081$ , DMSO-Ipatasertib \*  $P=0.028$ ; N=6 independent experiments, boxplot shows median, first and third quartiles. Upper/lower whiskers extend to 1.5 \* the interquartile range)

C) Graph shows the average pausing of H<sub>c</sub>T-containing organelles per experiment after Capivasertib and Ipatasertib treatment for 45 mins before imaging (\*  $P=0.027$ , One-way ANOVA, Tukey's post-hoc test: DMSO-Capivasertib  $P=0.20$ , DMSO-Ipatasertib \*  $P=0.022$ , N=6 independent experiments, data shown are mean  $\pm$  SEM).

D) Speed distribution profile of Capiwasertib- and Ipatasertib-treated neurons and controls. Both compounds caused an increase in instantaneous velocities of H<sub>c</sub>T-containing organelles compared to controls (N=6 independent experiments , data shown are mean  $\pm$  SEM).

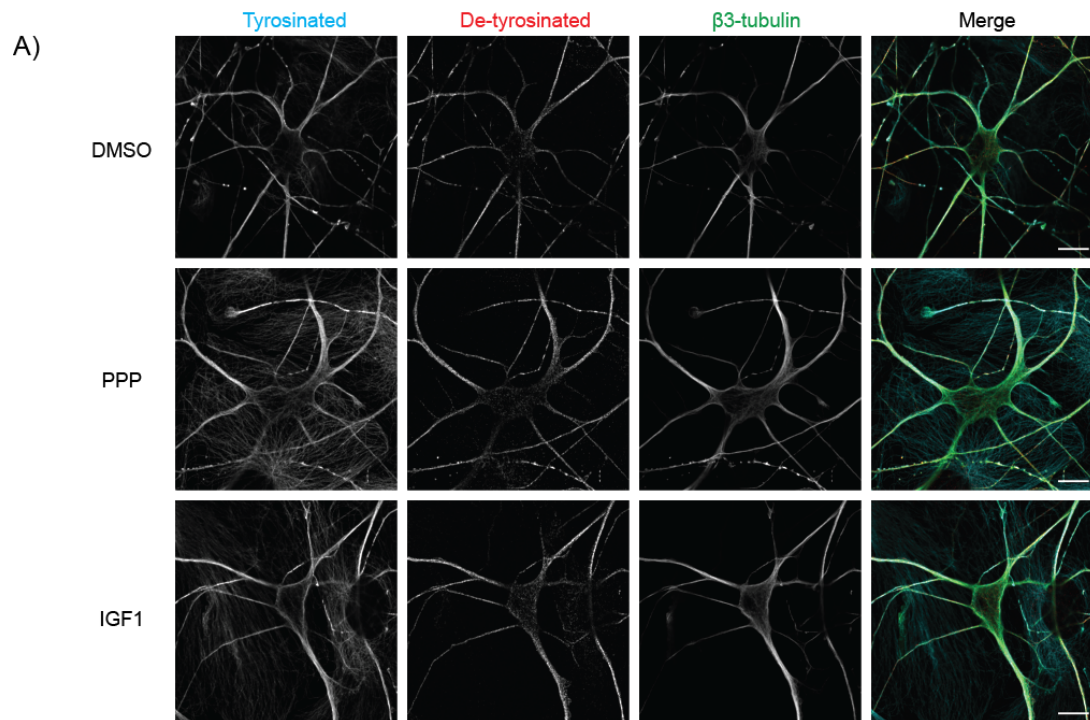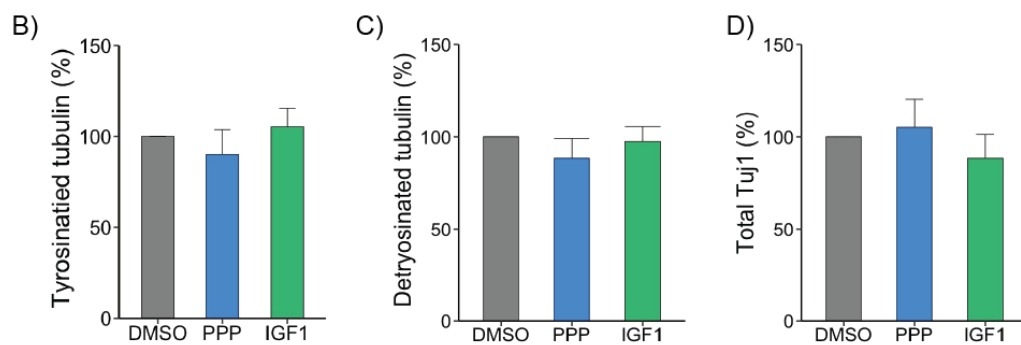

APPENDIX FIGURE S3- IGF1R MODULATION HAS NO EFFECT ON MICROTUBULE POST-TRANSLATIONAL MODIFICATIONS

A) Staining of tyrosinated and de-tyrosinated  $\alpha$ -tubulin and  $\beta$ -tubulin in PMN after treatment with 1  $\mu$ M PPP or 50 ng/ml IGF1 for 60 min. The scale bar is 10  $\mu$ m.

B) Quantification of tyrosinated  $\alpha$ -tubulin levels from A). Results were normalised relative to  $\beta$ -tubulin. IGF1R modulation had no effect on the amount of tyrosinated  $\alpha$ -tubulin (DMSO- 100%, IGF1- 105.3  $\pm$  9.9%, PPP- 89.9  $\pm$  13.8%, P=0.55, one-way ANOVA, N= 4 independent experiments, 31-32 cells per condition, data shown are mean  $\pm$  SEM).

C) Quantification of detyrosinated  $\alpha$ -tubulin levels from A). Results were normalised relative to  $\beta$ -tubulin. There was no change after treatment (DMSO- 100%, PPP- $88.2 \pm 10.9\%$ , IGF1-  $97.5 \pm 8.0\%$ ,  $P=0.55$ , one-way ANOVA, N=4 independent experiments, 31-32 cells per condition, data shown are mean  $\pm$  SEM).

D) Quantification of  $\beta$ -tubulin levels from A). Treatment with PPP or IGF1 did not affect the amount of  $\beta$ -tubulin present in PMN (DMSO-100%, PPP-  $105 \pm 15.2\%$ , IGF1-  $87.9 \pm 13.1\%$ ,  $P=0.59$ , one-way ANOVA, N=4 independent experiments, 31-32 cells per condition). Data shown are mean  $\pm$  SEM.

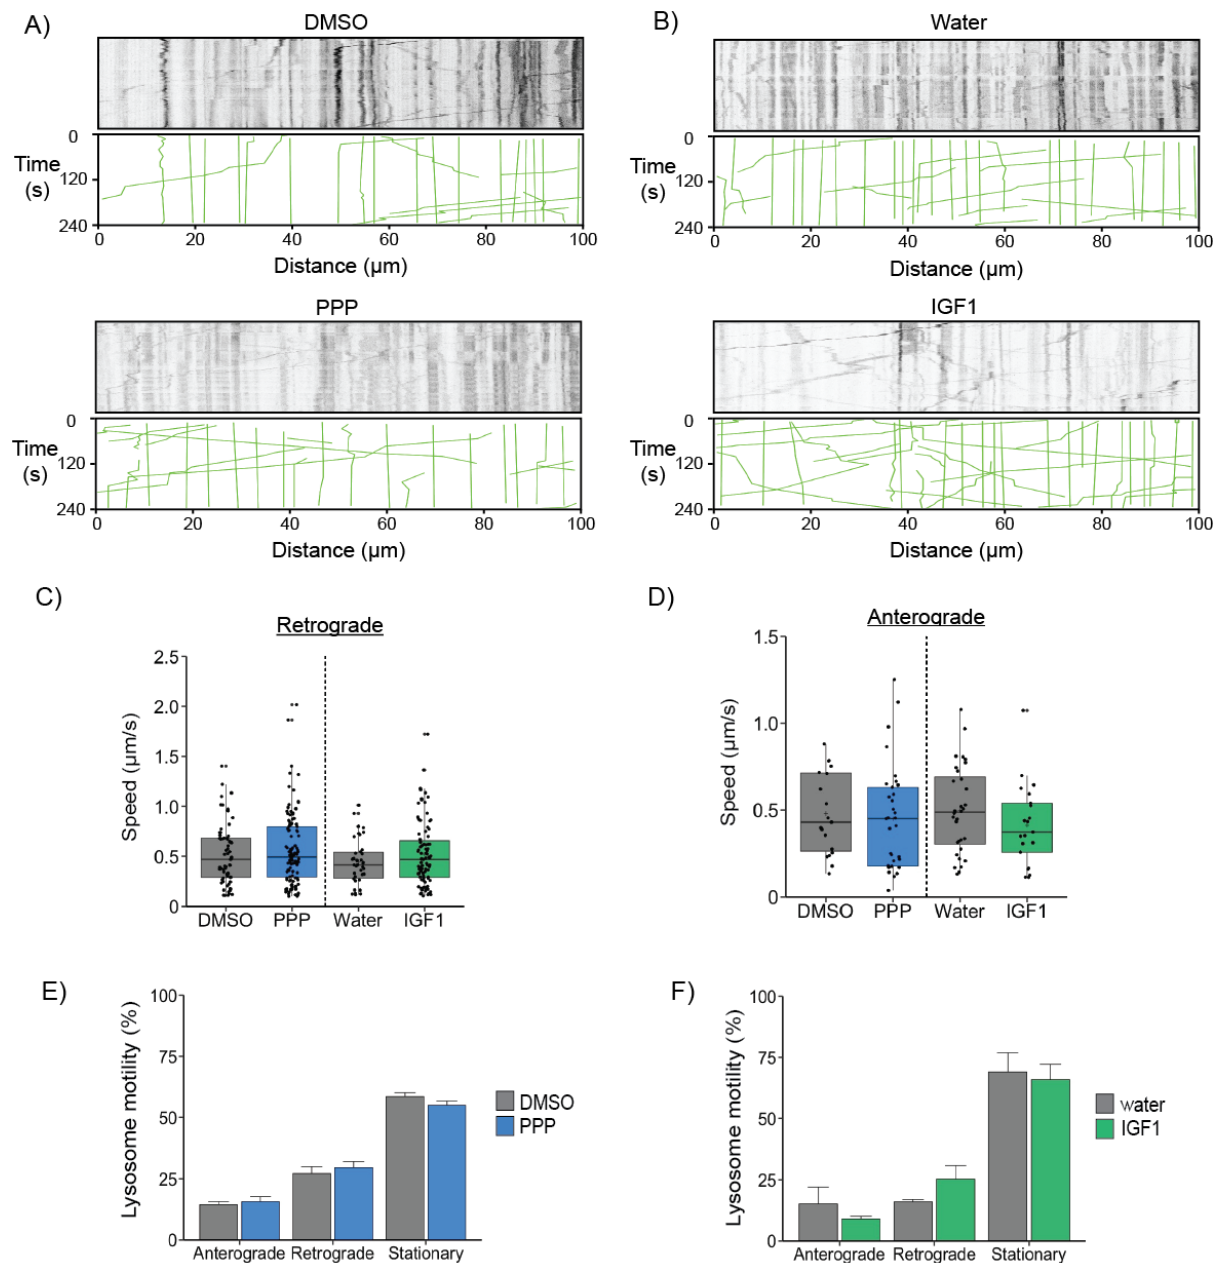

**APPENDIX FIGURE S4- IGF1R ACTIVITY DOES NOT AFFECT AXONAL TRANSPORT OF LYSOSOMES**

A) Kymographs of LysoTracker™ Green DND-26 labelled lysotracker in DIV 6 PMN after treatment with 1 μM PPP or control for 45 min.

B) Kymographs of LysoTracker™ Green DND-26 labelled lysotracker in DIV 6 PMN after treatment with 50 ng/ml IGF1 or control for 45 min.

C) Analysis of IGF1R modulation on retrograde lysosomal velocity. Neither PPP or IGF1 treatment had a significant effect on retrograde transport of lysosomes (DMSO:  $0.53 \pm 0.04 \mu\text{m/s}$ , cargo- 65, N=2 independent experiments; PPP:  $0.57 \pm 0.03 \mu\text{m/s}$ , cargo- 112, N=3 independent experiments; P= 0.41, Student's T-test; water:  $0.44 \pm 0.04 \mu\text{m/s}$ , cargo- 38, N=3 independent experiments; IGF1:  $0.52 \pm 0.03 \mu\text{m/s}$ , cargo- 91, N=3 independent experiments, P= 0.13, Student's T-test, boxplot shows median, first and third quartiles. Upper/lower whiskers extend to 1.5 \* the interquartile range).

D) Analysis of IGF1R modulation on anterograde lysosomal velocity. PPP and IGF1 caused no significant change in anterograde transport rates (DMSO:  $0.48 \pm 0.05 \mu\text{m/s}$ , cargo- 19, videos- 13, N= 2 independent experiments; PPP:  $0.4 \pm 0.05 \mu\text{m/s}$ , cargo- 33, videos- 22, N= 3 independent experiments; P= 0.68, Student's T-test; water:  $0.49 \pm 0.04 \mu\text{m/s}$ , cargo- 32, N=3 independent experiments video- 13; IGF1:  $0.41 \pm 0.05 \mu\text{m/s}$ , cargo- 21, N=3 independent experiments, videos-21; P= 0.22, Student's T-test, boxplot shows median, first and third quartiles. Upper/lower whiskers extend to 1.5 \* the interquartile range).

E) Analysis of the directionality of lysosome transport. There was no change in the directionality of lysosome transport after PPP treatment compared to controls (anterograde: DMSO-  $14.4 \pm 1.2\%$ , cargo- 48; PPP-  $15.6 \pm 2.1\%$ , cargo- 81, P= 0.65; retrograde: DMSO-  $27 \pm 2.8\%$ , cargo-88, PPP-  $29.4 \pm 2.5\%$ , cargo- 160, P= 0.58; stationary: DMSO-  $58.6 \pm 1.6\%$ , cargo- 194; PPP-  $55 \pm 1.8\%$ , cargo- 295, P= 0.24, Student's T-test, N=2 for DMSO and N=3 for all other conditions, data shown are mean  $\pm$  SEM).

F) Analysis of the directionality of lysosome transport. IGF1 didn't change the directionality of lysosomes after treatment. Quantified from B) (anterograde: water-  $15.1 \pm 6.9\%$ , cargo- 55; IGF-  $8.9 \pm 1.1\%$ , cargo- 39, P= 0.53; retrograde: water-  $15.9 \pm 1.0\%$ , cargo- 55, IGF-  $25.3 \pm 5.4\%$ , cargo- 120, P= 0.22; stationary: water-  $69 \pm 7.9\%$ , cargo- 232, IGF-  $65.8 \pm 6.3\%$ , cargo-290, P= 0.783, Student's T-test, N=2 for DMSO and N=3 for all other conditions, data shown are mean  $\pm$  SEM).



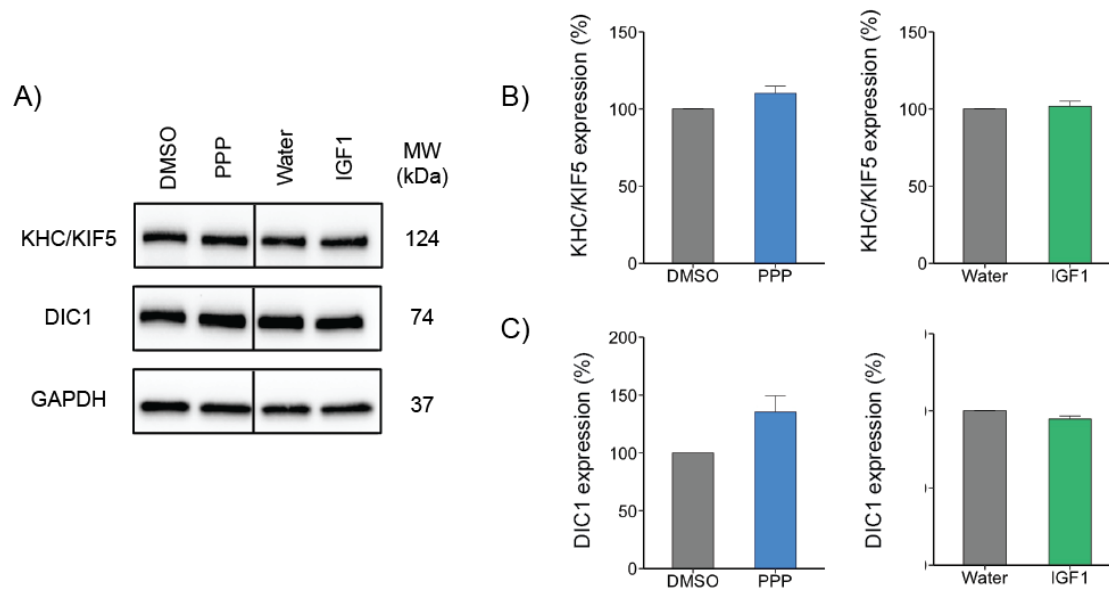

APPENDIX FIGURE S5- IGF1R MODULATION HAS NO EFFECT ON THE EXPRESSION OF CYTOPLASMIC DYNEIN OR KINESIN-1

A) PMN were treated with 1  $\mu$ M PPP or 50 ng/ml IGF1 for 60 min and the expression of dynein intermediate chain (DIC1) and kinesin-1 (KHC/KIF5) were assessed via western blot. All proteins were assessed on the same blot along with proteins in Fig5.

B and C) Quantification of western blots in A). Protein levels were normalised to GAPDH. There was no significant change in levels of both motor proteins after treatment with PPP (KHC/KIF5: DMSO-100%, PPP-110.2  $\pm$  4.7%, N=3 independent experiments, P=0.16; DIC1: DMSO-100%, PPP-135  $\pm$  14.1%, N=5 independent experiments, P=0.067, Student's T-test) or IGF1 (KHC: water-100%, IGF1-101.76  $\pm$  3.2%, N=3, P=0.63; DIC: water-100%, IGF1-94.7  $\pm$  2.1%, N=3 independent experiments, P=0.12, Student's T-test, data shown are mean  $\pm$  SEM).

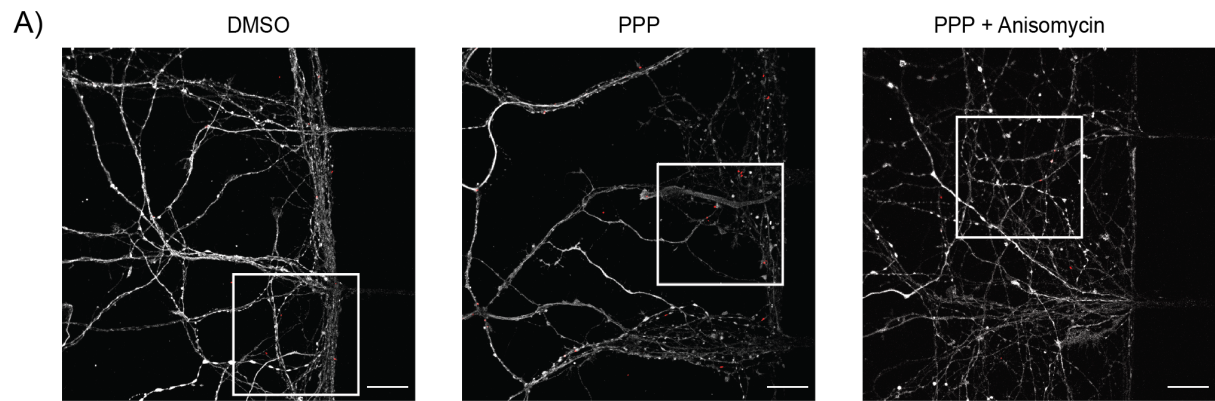

APPENDIX FIGURE S6- EXAMPLE IMAGES FROM PUROMYCIN-PLA

A) Puromycin-PLA images from the axonal compartment of PMN treated with PPP grown in microfluidic devices. White box indicates the zoomed region shown in Fig 6. Scale bars are 25  $\mu\text{m}$ . White-  $\beta$ 3-tubulin.

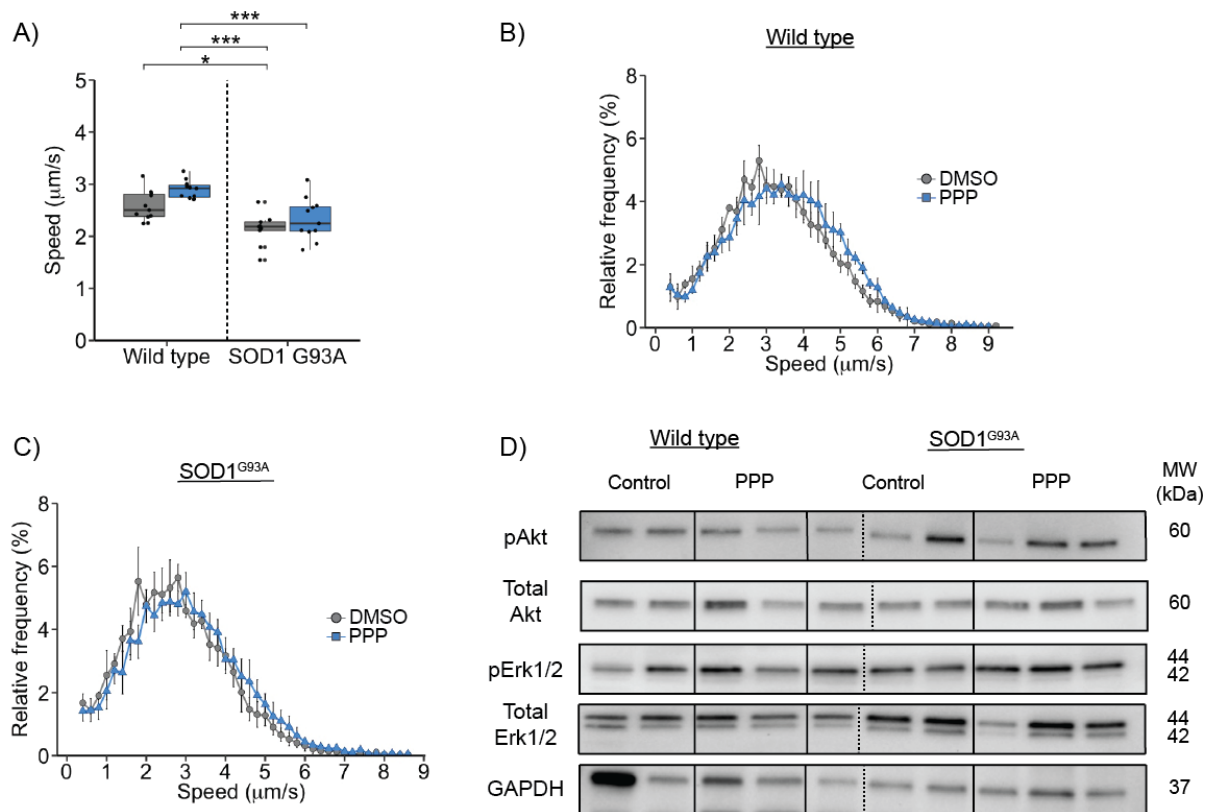

**APPENDIX FIGURE S7- IGF1R INHIBITION INCREASES THE RATE OF RETROGRADE AXONAL TRANSPORT IN AN ALS MOUSE MODEL**

A) The graph shows the average velocity of H<sub>2</sub>T-containing organelles per video (P=0.019 (treatment), P= 3.83x10<sup>-6</sup> (genotype), two-way ANOVA, Tukey's post-hoc test, WT-control: SOD1<sup>G93A</sup>- control, \* P=0.01 ; WT-control: WT-PPP, P=0.09; WT-PPP: SOD1<sup>G93A</sup>- control, \*\*\* P=0.00001; WT-PPP: SOD1<sup>G93A</sup>- PPP, \*\*\* P=0.0005, N=4 independent experiments for all conditions).

B) and C) Speed distribution graphs of wild type and SOD1<sup>G93A</sup> mice treated with PPP (blue squares) or vehicle control (grey circles). Graphs show increase in instantaneous velocities in both wild type and SOD1<sup>G93A</sup> mice. N=4 independent experiments. Data shown are mean ± SEM.

D) Example western blot of sciatic nerve lysates from wild type and SOD1<sup>G93A</sup> mice treated with either PPP or vehicle control were probed for pAKT (Ser473), total Akt, pErk1/2 (Thr 202/ Tyr 204) and total Erk1/2. Dashed line indicated where blots have been joined.
