# Supplementary material for: IGF1R regulates retrograde axonal transport of signalling endosomes in motor neurons
Source: PubMed Central journal article supplement (PMC7054680; doi:10.15252/embr.201949129), 2020-02-07
Supplement: EMBR-21-e49129-s002.pdf [file EMBR-21-e49129-s002.pdf]

## Expanded View Figures

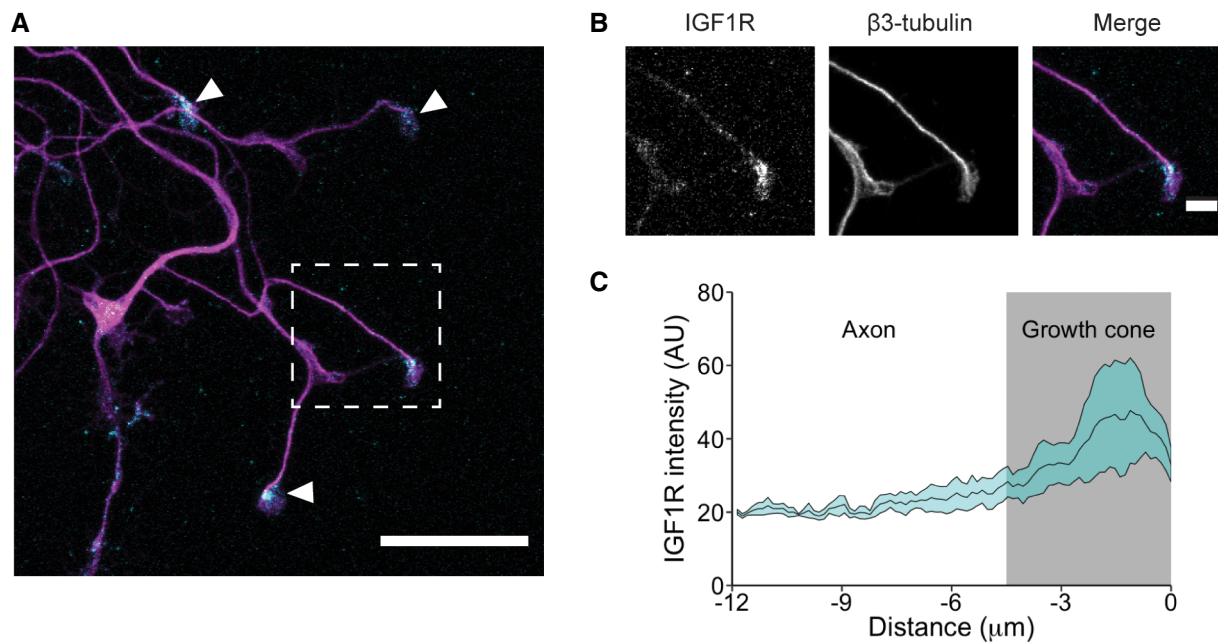

**Figure EV1. IGF1R localizes to the axonal growth cone.**

- A Example image of DIV6 PMN labelled with  $\beta 3$ -tubulin and IGF1R. White arrowheads point to axonal growth cones. Box shows zoomed region in B). The scale bar length is 20  $\mu\text{m}$ .
- B IGF1R staining at the growth cones of axons. The scale bar length is 4  $\mu\text{m}$ .
- C Quantification of IGF1R intensity along the axon. IGF1R accumulates at the growth cone of axonal processes (72 cells,  $N=3$  independent experiment). All data shown are mean  $\pm$  SEM.

**Figure EV2. PPP downregulates Akt signalling.**

- A pAkt staining in PMN treated with PPP or IGF1. The scale bar is 10  $\mu\text{m}$ .
- B Image quantification. PPP treatment reduces the mean pAkt intensity in PMN ( $*P = 0.046$ , Student's  $t$ -test, 32 cells for each condition,  $N = 3$  independent experiment). IGF1 caused no significant change in pAkt levels in PMN ( $P = 0.25$ , Student's  $t$ -test, 32 cells for each condition,  $N = 3$  independent experiments). All data shown are mean  $\pm$  SEM.
- C Representative Western blot showing the level of TSC2 phosphorylation in PMN and N2A cells after 1  $\mu\text{M}$  Capiasertib and Ipatasertib treatment for 60 min. GAPDH was used as a loading control.
- D Quantification of Western blot data. PMN and N2A cells were treated with either 1 nM, 10 nM, 100 nM or 1  $\mu\text{M}$  of Capiasertib and Ipatasertib for 60 min. PMNs show decreased level of TSC2 phosphorylation after treatment. Capiasertib and Ipatasertib (1  $\mu\text{M}$ ) are  $N = 2$  independent experiments. All other conditions are  $N = 3$  independent experiments; data shown are mean  $\pm$  SEM.
- E Quantification of Western blot data. N2A shows decreased level of TSC2 phosphorylation after treatment with Capiasertib and Ipatasertib. Capiasertib 10 nM and 100 nM are  $N = 3$  independent experiments; all other conditions are  $N = 4$  independent experiments; data shown are mean  $\pm$  SEM.

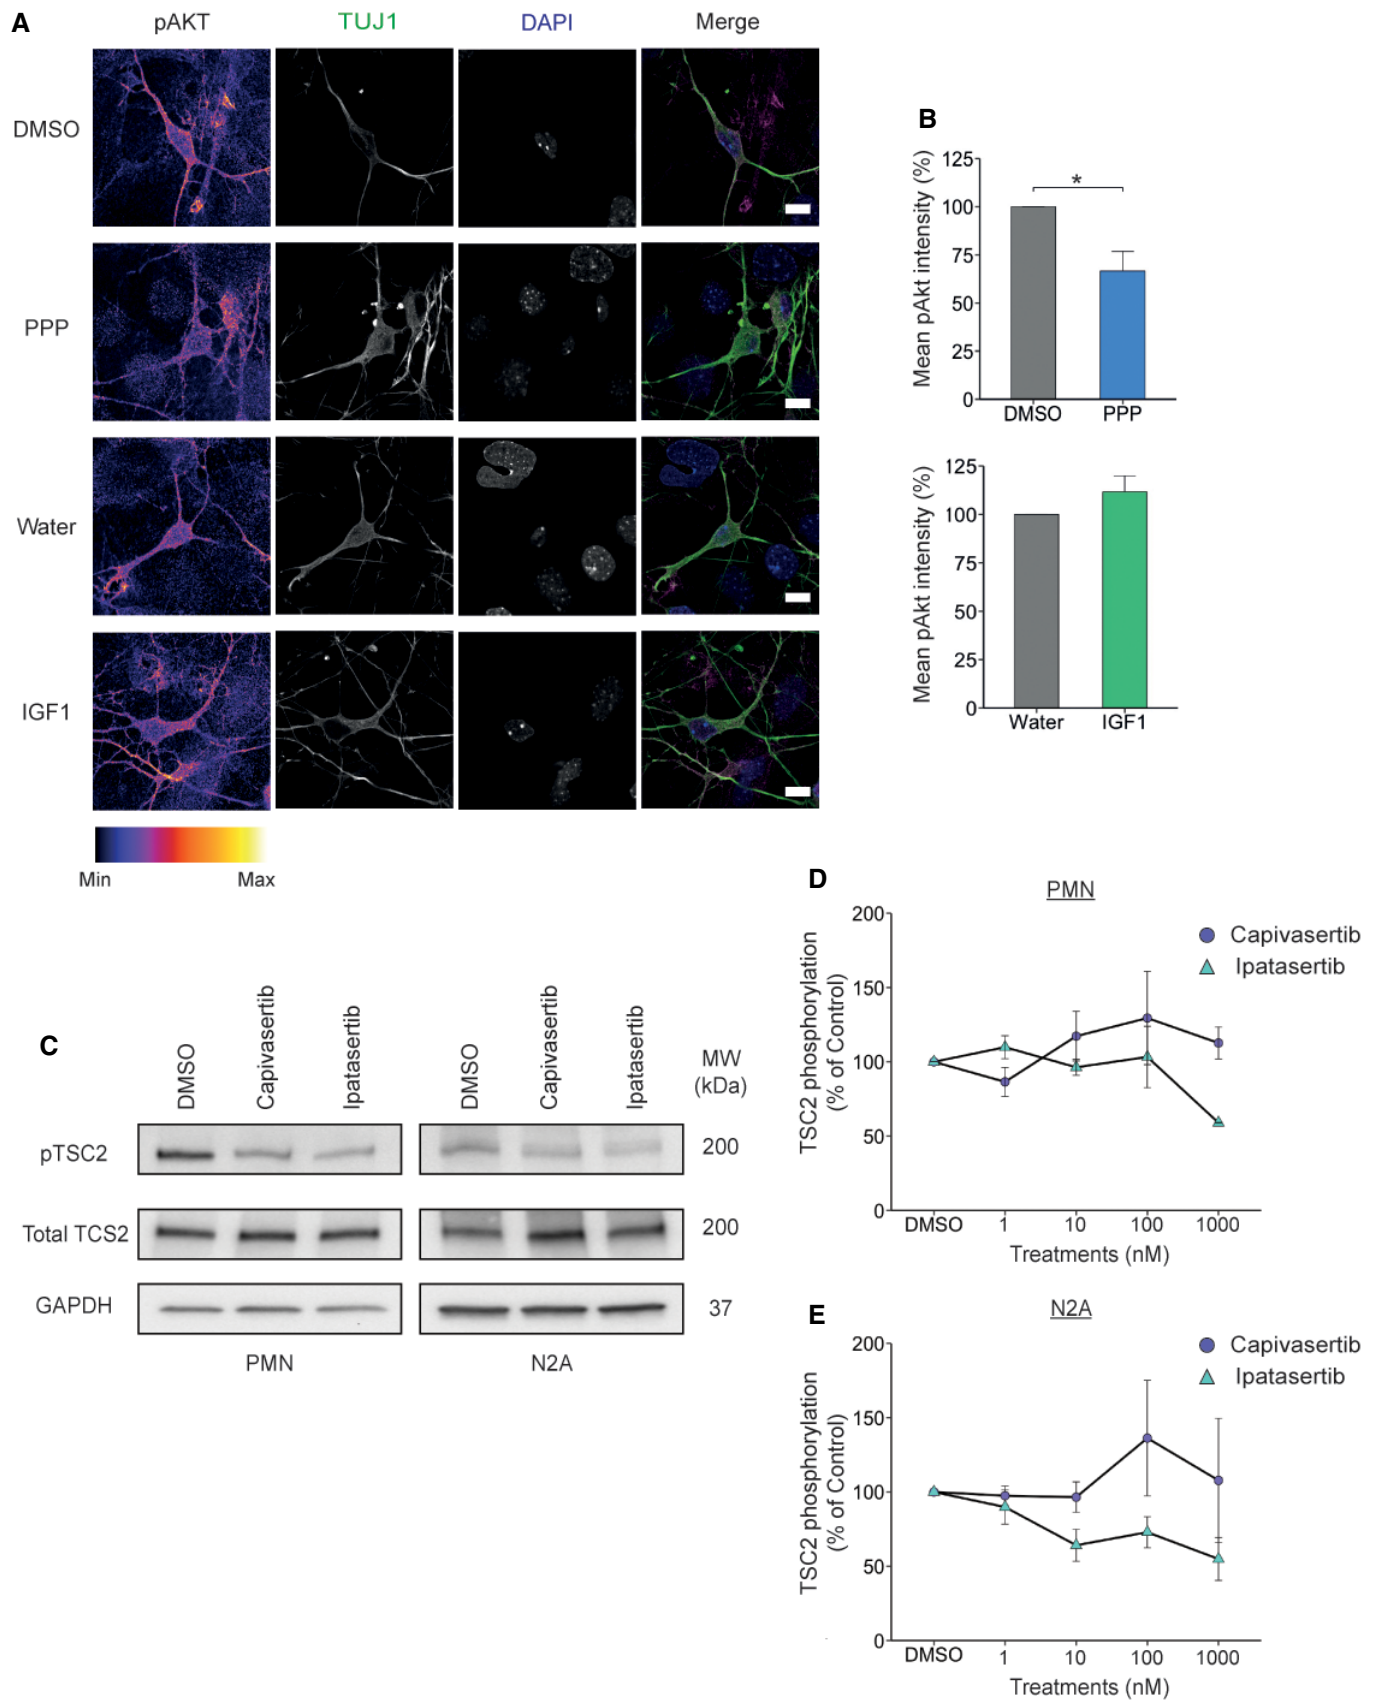

Figure EV2.

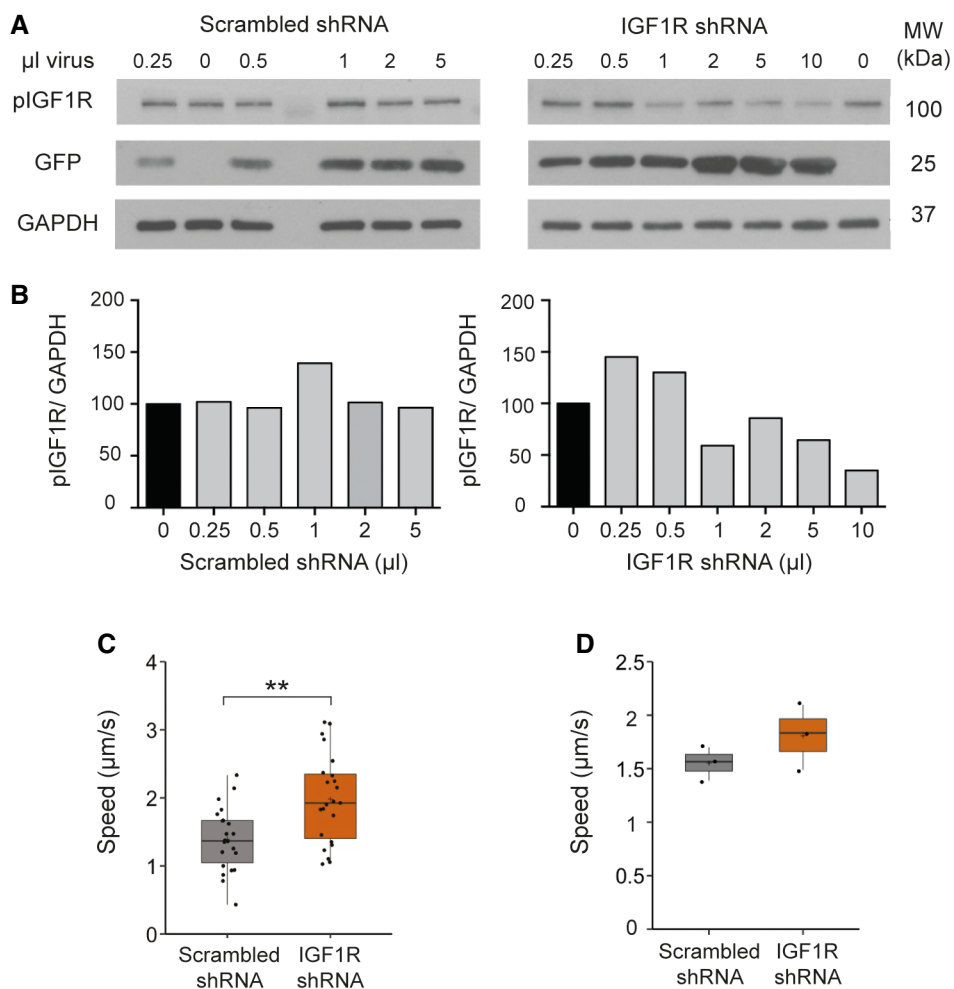

**Figure EV3. shRNA knockdown of IGF1R in PMN.**

- A Western blot of pIGF1R after lentiviral delivery of a shRNA targeting IGF1R or scrambled control in PMN. Cells were lysed 6 days after treatment.
- B The quantification of the Western blots in A). The shRNA viral construct effectively decreases levels of pIGF1R compared to scrambled control ( $N = 1$  independent experiments).
- C Graph shows the average velocity of H<sub>2</sub>T-containing organelles per axon after IGF1R knockdown (\*\* $P = 0.001$ , Student's  $t$ -test,  $N = 3$  independent experiments; boxplot shows median, first and third quartiles. Upper/lower whiskers extend to 1.5 \* the interquartile range).
- D Graph shows the average velocity of H<sub>2</sub>T-containing organelles per experiment after IGF1R knockdown ( $P = 0.26$ , Student's  $t$ -test,  $N = 3$  independent experiments; boxplot shows median, first and third quartiles. Upper/lower whiskers extend to 1.5 \* the interquartile range).

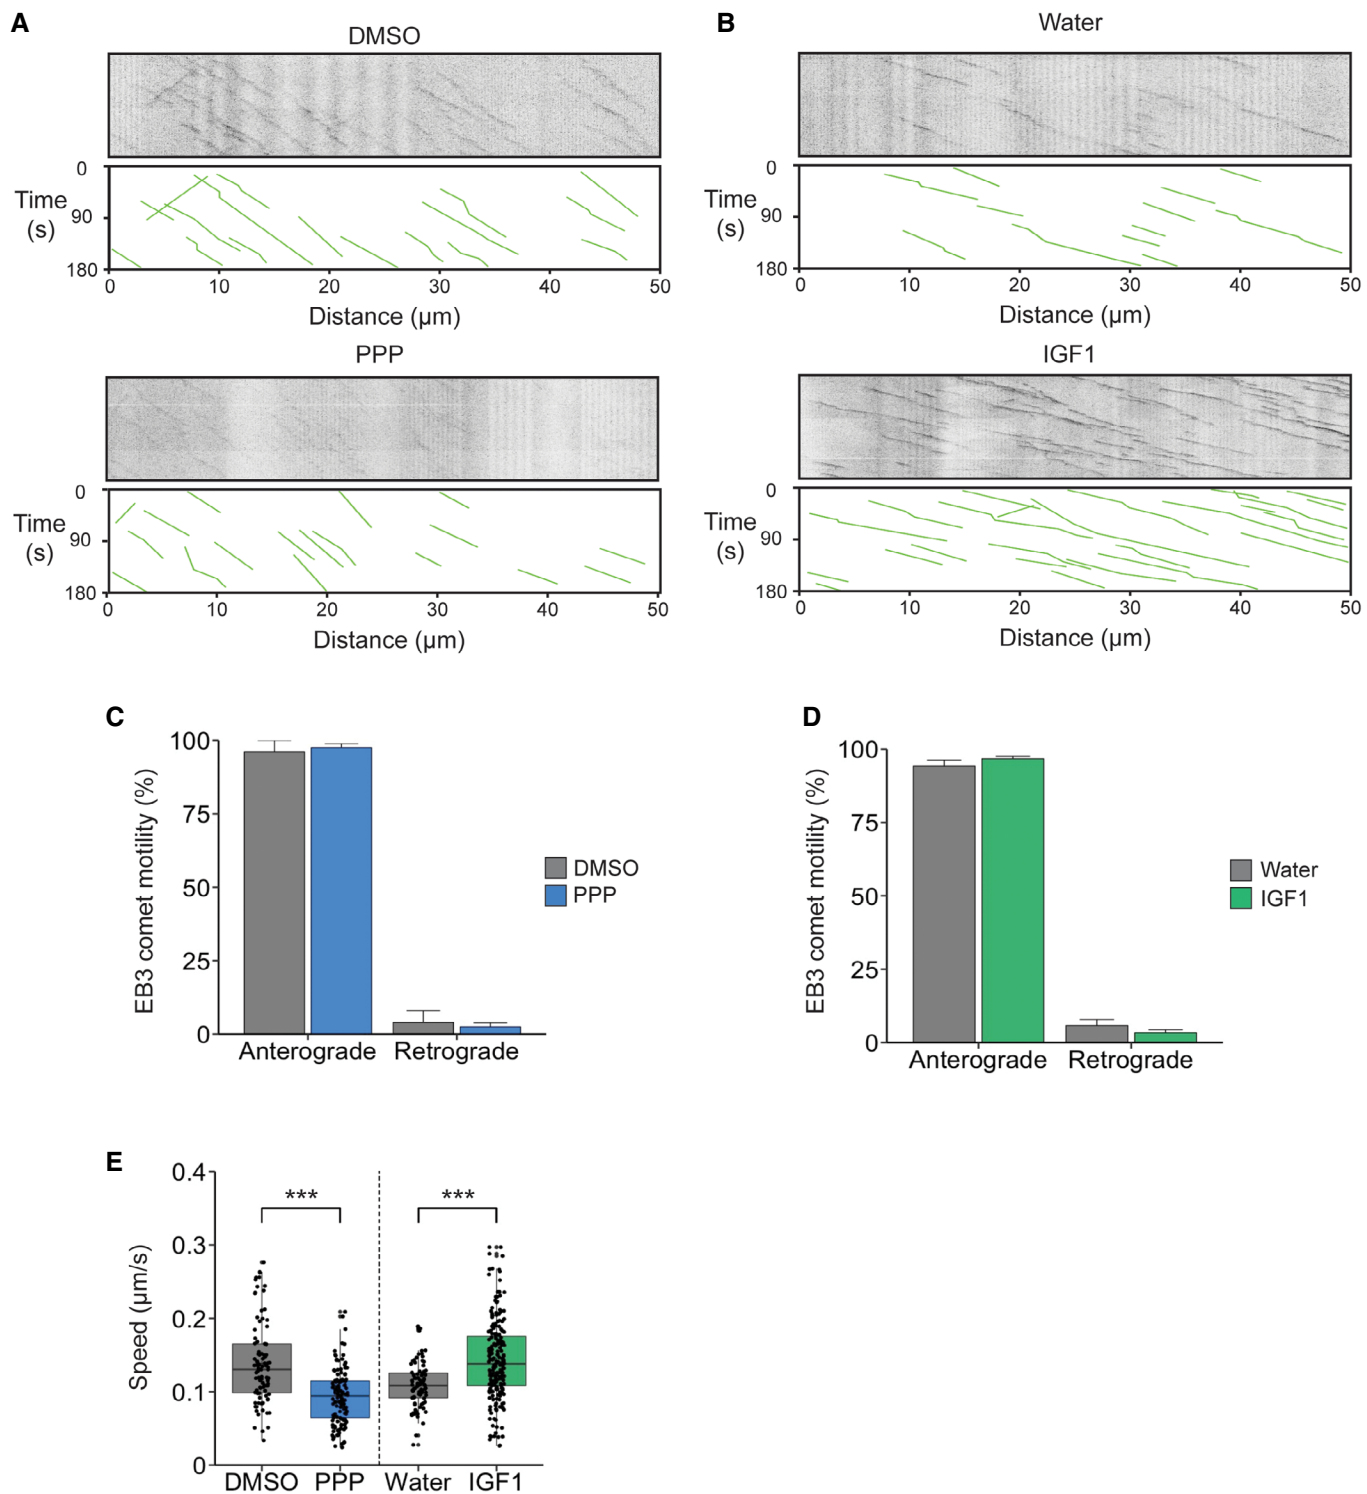

Figure EV4.

**Figure EV4. IGF1R influences microtubule dynamics but does not alter polarity.**

- A Kymographs of GFP-EB3 comets after treatment with 1  $\mu$ M PPP or DMSO for 45 min.
- B Kymographs of GFP-EB3 comets after treatment with 50 ng/ml IGF1 or water for 45 min.
- C Quantification of EB3-GFP directionality after PPP treatment. There was no change in microtubule polarity (anterograde: DMSO- 96.1  $\pm$  3.9%; PPP- 97.6 $\pm$  1.3%,  $P = 0.77$ ; retrograde: DMSO-3.9  $\pm$  3.9% versus 2.4  $\pm$  1.3%,  $P = 0.77$ , Student's  $t$ -test,  $N = 4$  independent experiments (PPP),  $N = 2$  independent experiments (DMSO); data shown are mean  $\pm$  SEM).
- D Quantification of EB3-GFP directionality after IGF1 treatment. IGF1 also caused no change in polarity of new microtubules (anterograde: water- 96.6  $\pm$  1.0%; IGF1- 94.2  $\pm$  2.0%,  $P = 0.23$ ; retrograde: water- 3.4  $\pm$  1.0% versus 5.8  $\pm$  2.0%,  $P = 0.23$ , Student's  $t$ -test,  $N = 4$  independent experiments (IGF1), 2 independent experiments (water); data shown are mean  $\pm$  SEM).
- E Analysis of GFP-EB3 comet velocity after treatment with PPP or IGF1. PPP significantly reduced the average velocity of GFP-EB3 comets compared to controls (DMSO, 91 EB3 comets, 10 axons; PPP, 138 comets, 23 axons; \*\*\* $P = 2.6 \times 10^{-10}$ ,  $N = 4$  independent experiments, Student's  $t$ -test). IGF1 increased the growth rate of GFP-EB3 comets compared to controls (water, 85 comets, 14 axons; IGF1, 213 comets, 25 axons; \*\*\* $P = 1.7 \times 10^{-10}$ ,  $N = 4$  independent experiments, Student's  $t$ -test; boxplot shows median, first and third quartiles. Upper/lower whiskers extend to 1.5 \* the interquartile range).

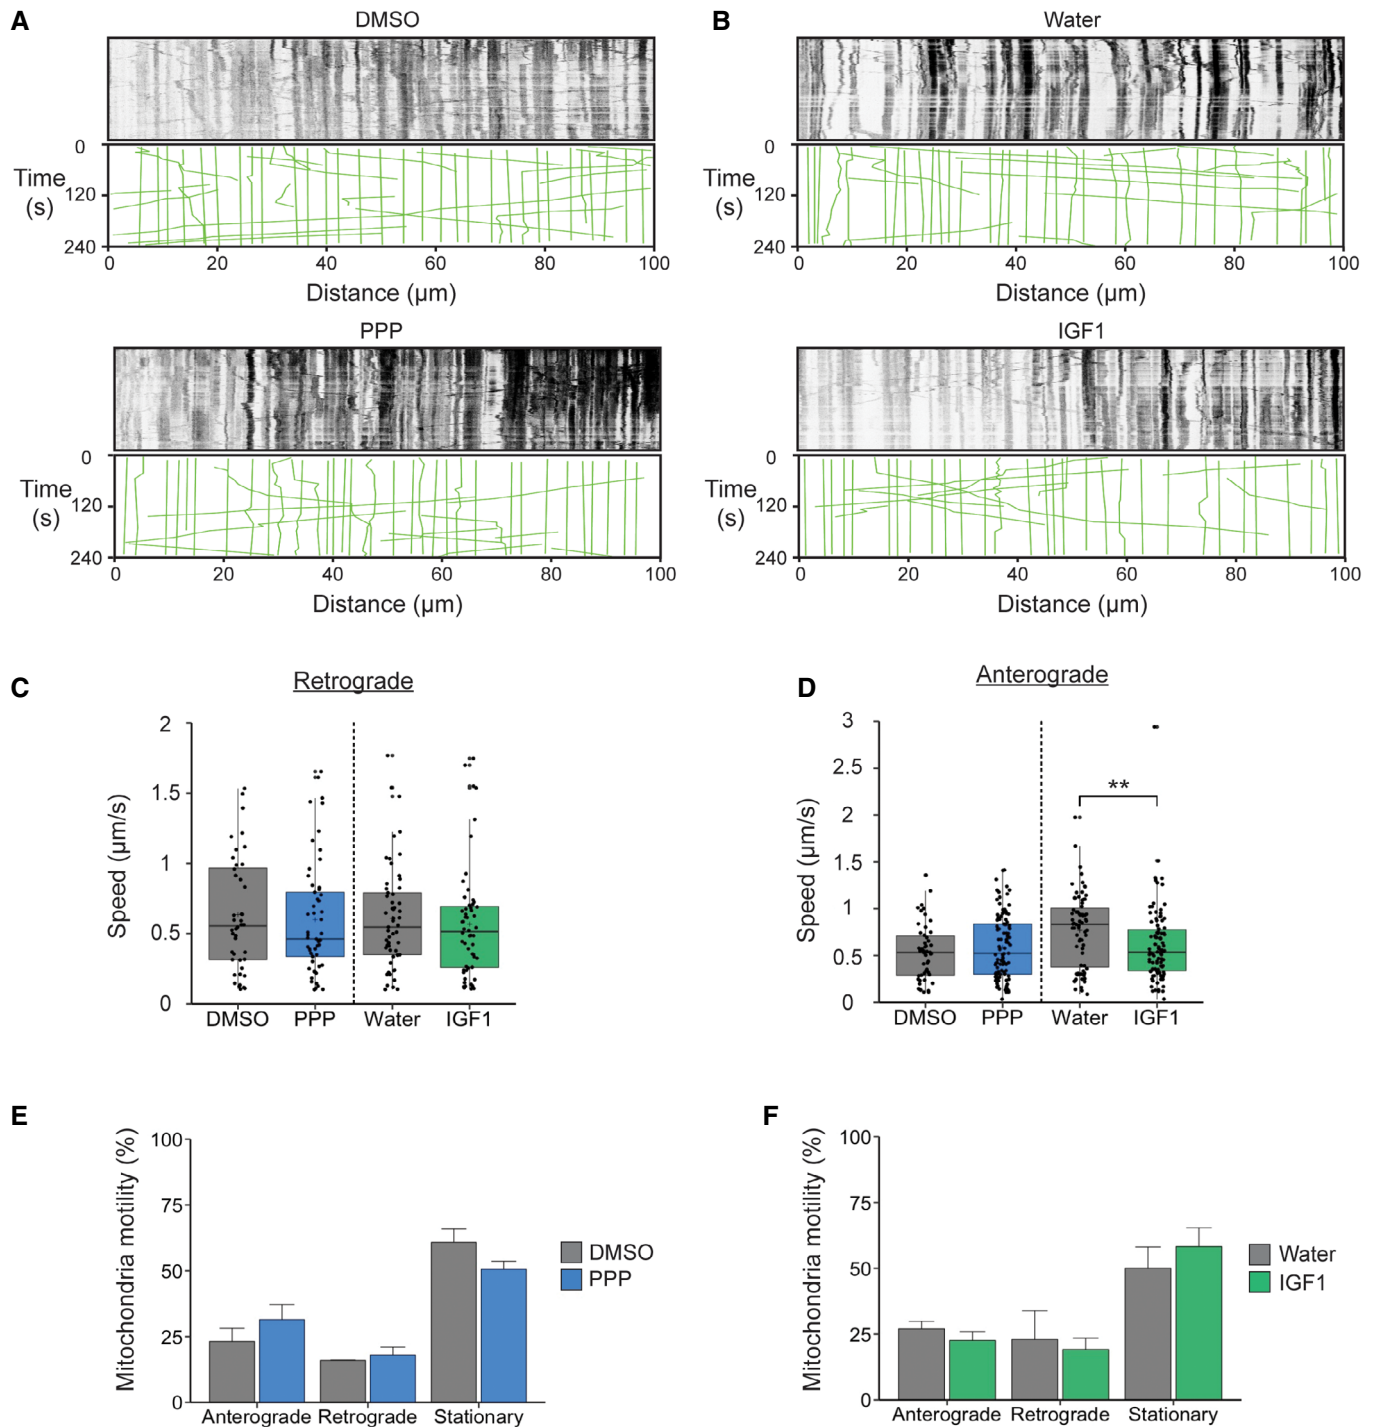

Figure EV5.

**Figure EV5. IGF1R activity does not impact on the axonal trafficking of mitochondria.**

- A Kymographs of TMRM-labelled mitochondria in DIV 6 PMN after treatment with 1  $\mu$ M PPP or DMSO for 45 min.
- B Kymographs of TMRM-labelled mitochondria in DIV 6 primary motor neurons after treatment with 50 ng/ml IGF1 or water for 45 min.
- C IGF1R modulation does not impact on the retrograde transport of mitochondria (DMSO:  $0.64 \pm 0.06$   $\mu$ m/s, 45 organelles,  $N = 2$  independent experiments; PPP:  $0.60 \pm 0.05$   $\mu$ m/s, 57 organelles,  $N = 3$  independent experiments;  $P = 0.66$ , Student's  $t$ -test; water:  $0.61 \pm 0.05$   $\mu$ m/s, 57 organelles,  $N = 3$  independent experiments; IGF1:  $0.57 \pm 0.05$   $\mu$ m/s, 56 organelles,  $N = 3$  independent experiments,  $P = 0.56$ , Student's  $t$ -test; boxplot shows median, first and third quartiles. Upper/lower whiskers extend to 1.5 \* the interquartile range).
- D Effect of IGF1R treatment on anterograde mitochondrial velocity. PPP caused no significant change in transport rates (DMSO:  $0.54 \pm 0.04$   $\mu$ m/s, 50 organelles,  $N = 2$  independent experiments; PPP:  $0.59 \pm 0.03$   $\mu$ m/s, 105 organelles,  $N = 3$  independent experiments;  $P = 0.32$ , Student's  $t$ -test). In contrast, IGF1 treatment significantly slowed down anterograde mitochondria moving anterogradely (water:  $0.76 \pm 0.05$   $\mu$ m/s, 75 organelles,  $N = 3$  independent experiments; IGF1:  $0.60 \pm 0.04$   $\mu$ m/s, 98 organelles; \*\* $P = 0.009$ , Student's  $t$ -test,  $N = 3$  independent experiments; boxplot shows median, first and third quartiles. Upper/lower whiskers extend to 1.5 \* the interquartile range).
- E Quantification shows that the directionality of mitochondria transport after PPP treatment is not affected (anterograde: DMSO,  $23.17 \pm 5.0\%$ , 93 organelles,  $N = 2$  independent experiments; PPP,  $31.46 \pm 5.6\%$ , 177 organelles,  $N = 3$  independent experiments,  $P = 0.35$ ; retrograde: DMSO,  $16.02 \pm 0.13\%$ , 64 organelles,  $N = 2$  independent experiments, PPP,  $17.98 \pm 3.0\%$ , 105 organelles,  $N = 3$  independent experiments,  $P = 0.58$ ; stationary: DMSO,  $60.8 \pm 5.1\%$ , 248 organelles,  $N = 2$  independent experiments; PPP,  $50.55 \pm 3.1\%$ , 291 organelles,  $N = 3$  independent experiments,  $P = 0.24$ , Student's  $t$ -test; data shown are mean  $\pm$  SEM).
- F Quantification shows that IGF1 treatment does not alter the directionality of mitochondria (anterograde: water,  $26.99 \pm 2.9\%$ , 119 organelles,  $N = 3$  independent experiments; IGF1,  $22.58 \pm 3.4\%$ , 136 organelles,  $N = 3$  independent experiments,  $P = 0.39$ ; retrograde: water,  $22.94 \pm 10.9\%$ , 95 organelles,  $N = 3$  independent experiments; IGF1,  $19.2 \pm 4.3\%$ , 115 organelles,  $P = 0.79$ ; stationary: water,  $50.1 \pm 8.0\%$ , 222 organelles,  $N = 3$  independent experiments; IGF1,  $58.25 \pm 7.1\%$ , 340 organelles,  $N = 3$  independent experiments,  $P = 0.51$ , Student's  $t$ -test; data shown are mean  $\pm$  SEM).
